# Supplementary material for: A novel technique based on in vitro oocyte injection to improve CRISPR/Cas9 gene editing in zebrafish
Source: PubMed Central journal article supplement (PMC5041118; doi:10.1038/srep34555), 2016-09-29
Supplement: srep34555-s1.pdf [file srep34555-s1.pdf]

1 **Supporting information**

2 **A novel technique based on *in vitro* oocyte injection to**  
3 **improve CRISPR/Cas9 gene editing in zebrafish**

4 Shao-Lin Xie<sup>1,2</sup>, Wan-Ping Bian<sup>2</sup>, Chao Wang<sup>1,2</sup>, Muhammad Junaid<sup>2,3</sup>, Ji-Xing  
5 Zou<sup>1\*</sup>, De-Sheng Pei<sup>2\*</sup>

6

7

8

9

10 <sup>1</sup>College of Marine Sciences, South China Agricultural University, Guangzhou, 510642,  
11 China

12 <sup>2</sup>Chongqing Institute of Green and Intelligent Technology, Chinese Academy of  
13 Sciences, Chongqing, 401122, China

14 <sup>3</sup>University of Chinese Academy of Sciences, Beijing 100049, China

15 \*Corresponding authors.

16 E-mails:[zoujixing@163.com](mailto:zoujixing@163.com)(J.X.Z), [deshengpei@gmail.com](mailto:deshengpei@gmail.com) (D.S.P) and  
17 [peids@cigit.ac.cn](mailto:peids@cigit.ac.cn) (D.S.P)

18

19

20

21 **Table S1 Toxicity of Cas9 capped RNAs and sgRNAs in oocytes\***

22

| Trials No. | Total amount |     |     | Fertilization |    |    | Hatching |    |    |
|------------|--------------|-----|-----|---------------|----|----|----------|----|----|
|            | 1            | 2   | 3   | 1             | 2  | 3  | 1        | 2  | 3  |
| Control    | 104          | 112 | 105 | 83            | 87 | 81 | 79       | 85 | 75 |
| Phenol red | 111          | 124 | 116 | 68            | 74 | 60 | 63       | 69 | 55 |
| Cas9/sgRNA | 118          | 135 | 120 | 72            | 71 | 58 | 58       | 55 | 44 |

23 \*Control represented oocytes stored *in vitro* for 30 min without injection. Phenol red or  
 24 Cas9/sgRNA indicated that oocytes were stored *in vitro* for 30 min and then injected with phenol  
 25 red or Cas9 capped RNAs and sgRNAs, respectively.

26

27

28 **Table S2 The efficiency of *mloxP* knocked into *mc4r* in zebrafish\***

29

|                           | <b>Amount of detection</b> | <b>Amount of knock-in</b> |
|---------------------------|----------------------------|---------------------------|
| Oocytes storage injection | 25                         | 13                        |
|                           | 30                         | 15                        |
|                           | 30                         | 14                        |
| Normal injection          | 25                         | 7                         |
|                           | 30                         | 8                         |
|                           | 30                         | 7                         |

30 \*The experiment was repeated three times. The larvae carrying *mloxP* were detected by PCR at 72  
 31 hpf with *mc4r T7E* forward primer matching *mc4r* sequence and the *mloxP* reverse primer  
 32 matching the sequence of *mloxP* donor sequence.

33

34

35

36

37 **Table S3 The amount of mutations in P<sub>0</sub> generation using two different methods\***  
 38

| Number<br>of<br>detection | The amount of mutation |                 |                 |                 |                 |                 |                 |                 |                 |                 |
|---------------------------|------------------------|-----------------|-----------------|-----------------|-----------------|-----------------|-----------------|-----------------|-----------------|-----------------|
|                           | <i>mc4r</i>            |                 | <i>mpv17</i>    |                 | <i>mrp2b</i>    |                 | <i>mc3r</i>     |                 | <i>mstna</i>    |                 |
|                           | nP <sub>0</sub>        | sP <sub>0</sub> | nP <sub>0</sub> | sP <sub>0</sub> | nP <sub>0</sub> | sP <sub>0</sub> | nP <sub>0</sub> | sP <sub>0</sub> | nP <sub>0</sub> | sP <sub>0</sub> |
| 30                        | 25                     | 28              | 5               | 26              | 14              | 28              | 10              | 27              | 7               | 27              |
| 30                        | 26                     | 28              | 7               | 27              | 12              | 29              | 11              | 28              | 11              | 27              |
| 30                        | 25                     | 29              | 5               | 27              | 11              | 27              | 9               | 26              | 11              | 28              |

39 \*For each gene, the genomic DNAs were extracted from zebrafish tail at random and measured by  
 40 T7E1 assay. The results of T7E1 assay were confirmed by sequencing analysis. nP<sub>0</sub> and sP<sub>0</sub>  
 41 represented the generations from normal injected zygotes and injected oocytes after storage,  
 42 respectively.  
 43  
 44

45 **Table S4 The efficiencies of germline transmission of *mc4r* and *mpv17*\***

46

| No. | Gene         |     | Number of detection | Number of mutations |
|-----|--------------|-----|---------------------|---------------------|
| 1   | <i>mc4r</i>  | nF1 | 20                  | 14                  |
|     |              | sF1 | 28                  | 27                  |
|     | <i>mpv17</i> | nF1 | 17                  | 6                   |
|     |              | sF1 | 20                  | 18                  |
| 2   | <i>mc4r</i>  | nF1 | 24                  | 16                  |
|     |              | sF1 | 26                  | 26                  |
|     | <i>mpv17</i> | nF1 | 21                  | 7                   |
|     |              | sF1 | 25                  | 23                  |
| 3   | <i>mc4r</i>  | nF1 | 22                  | 16                  |
|     |              | sF1 | 27                  | 25                  |
|     | <i>mpv17</i> | nF1 | 19                  | 7                   |
|     |              | sF1 | 20                  | 18                  |

47 \*nF1 and sF1 represented the embryos from normal injection P<sub>0</sub> and oocytes storage injection P<sub>0</sub>,  
 48 respectively.

49

50

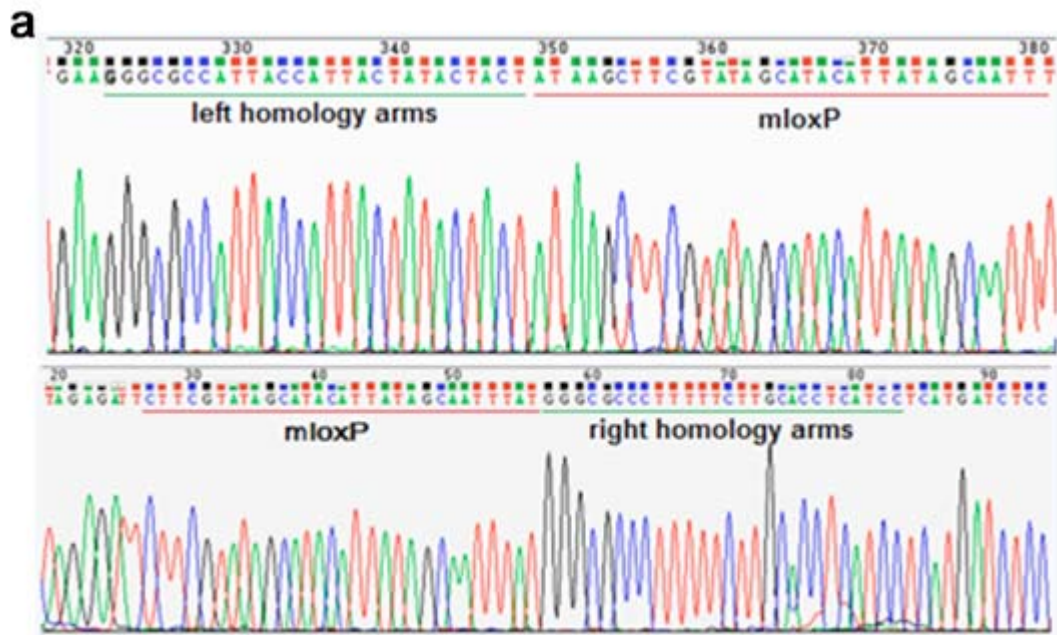

51

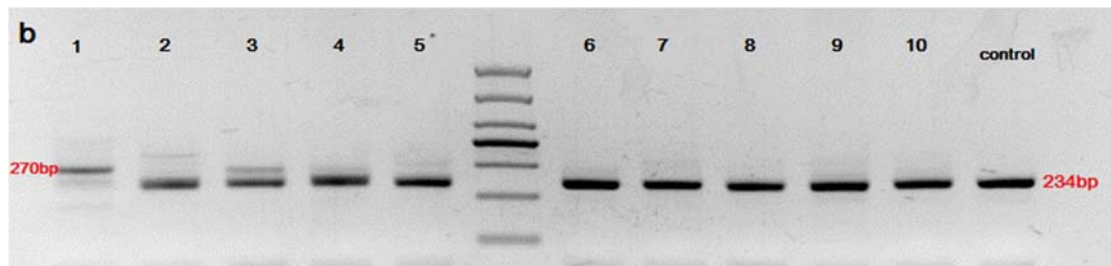

52

53

54

55 Figure S1. Identification of knocking *mloxP* gene into the *mc4r* locus in zebrafish  
56 using the novel technique based on *in vitro* oocyte injection. (a) Sequencing result  
57 showed the correct insertion of *mloxP* in the *mc4r* locus. PCR fragments were  
58 amplified using primer pairs *mc4r*-T7E-F/*mloxP*-R (upper panel) and *mloxP*-F/*mc4r*-T7E-  
59 R (lower panel) from 5 tested embryos for each groups and cloned into the pMD-19T  
60 vector for sequencing (4-6 clones/embryo). (b) PCR products from the genomic locus  
61 flanking the target site using primer pairs (*mloxP*- KI-JC-F/*mloxP*- KI-JC-R). The WT  
62 amplicons were 234 bp but *mloxP* knock-in amplicons were 270 bp. 1 -5: oocyte  
63 storage eggs; 6 -10: normal injection eggs.

|                 |                                                  |        |
|-----------------|--------------------------------------------------|--------|
| <i>mc4r-wt</i>  | ATACTACTGGGGGTGTTTGTGGTGTGCTGGGCGCCCTT           |        |
| <i>mc4r-1</i>   | ATACTACTGGGC-----TGGGCGCCCTT                     | -16/+1 |
| <i>mc4r-2</i>   | ATACTACTGGGGGTGTTTG-----TGGGCGCCCTT              | -8     |
| <i>mc4r-3</i>   | ATACTACTGGGGGTGTTTGTGG-----GCTGGGCGCCCTT         | -3     |
| <i>mc4r-4</i>   | ATACTACTGGGGGTGTTTGT-----TGGGCGCCCTT             | -7     |
| <i>mpv17-wt</i> | GGCGGGTCTTTGGAGATCTTATCAGGCTCTGATGGCCA           |        |
| <i>mpv17-1</i>  | GGCGGGTCTTTGGAGATCT- <b>GGCC</b> ATCAGGCTCTGATG  | -1/+4  |
| <i>mpv17-2</i>  | GGCGGGTCTTTGGAGATCT <b>GGAGATCTGGAGATCTGGA</b>   | -1/+20 |
| <i>mpv17-3</i>  | GGCGGGTCTTTGGAGA-----TCTGATGGCCA                 | -11    |
| <i>mpv17-4</i>  | GGCGGGTCTTTGGAGATC-----AGGCTCTGATGGCCA           | -5     |
| <i>mstna-wt</i> | TGGATGTAGACTGTGGTTGGCTCCTCAGTCGGAGGTAG           |        |
| <i>mstna-1</i>  | TGGATGTAGACTGTGGTTGGCTCCTCAG-----AGGTAG          | -4     |
| <i>mstna-2</i>  | TGGATGTAA <b>ACT</b> GTGGTTGGCTCCTCAGTCGGAGGTAG  | -1/+1  |
| <i>mstna-3</i>  | TGGATGTAGACTGTGGTTG-----TCAGTCGGAGGTAG           | -5     |
| <i>mstna-4</i>  | TGGATGTAGACTGTGGTTGGCTCCTCAG- <b>GG</b> AGGTAG   | -2     |
| <i>mrp2b-wt</i> | TGATTGGCTGTGAGCTGGAAGTGGGCGGGTCTCTGGCAT          |        |
| <i>mrp2b-1</i>  | TGATTGGCTGTGAGCTGG-----TCTGGCAT                  | -13    |
| <i>mrp2b-2</i>  | TGATTGGCTGTGAGCTGGAAGTGGGC-----CTCTGGCAT         | -4     |
| <i>mrp2b-3</i>  | TGATTGGCTGTGAGCTGG- <b>TGGATAGATAGATGATGTGT</b>  | -2/+15 |
| <i>mrp2b-4</i>  | TGATTGGCTGTGAGCTGGAAGT-----GGTCTCTGGCAT          | -5     |
| <i>mc3r-wt</i>  | CCACAGTATCGTGACCGTACGCAGAGCTCTGGTGGCCAT          |        |
| <i>mc3r-1</i>   | CCACAGTATCGTG-----GCAGAGCTCTGGTGGCCAT            | -7     |
| <i>mc3r-2</i>   | CCACAGTATCGTGACCGT-----TGGTGGCCAT                | -11    |
| <i>mc3r-3</i>   | CCACAGTATCGTGACCGTA-----AGCTCTGGTGGCCAT          | -5     |
| <i>mc3r-4</i>   | CCACAGTATCGTGACC- <b>CTCCATCC</b> CGCAGAGCTCTGGT | -3/+8  |

64

65 **Figure S2.** Genomic DNA sequencing of mutations induced by Cas9 cleavage at the  
66 targeted *mc4r*, *mpv17*, *mstna*, *mc3r* and *mrp2b* genes. The positive fragments  
67 confirmed by T7E1 assay were inserted into the pMD-19T vector and randomly  
68 sequenced. The deleted (-) and inserted (+) nucleotides were shown compared to the  
69 wild-type.

(a)

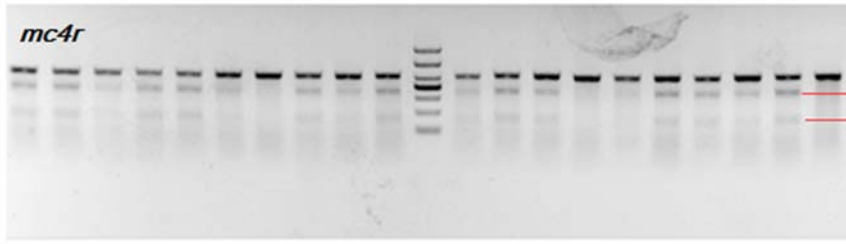

340 350 360 370 380  
T A T A C T A C T G G G G G T G T T T G T G G T G T G C T G G G C G C C C T T T T T C T T G C A C C

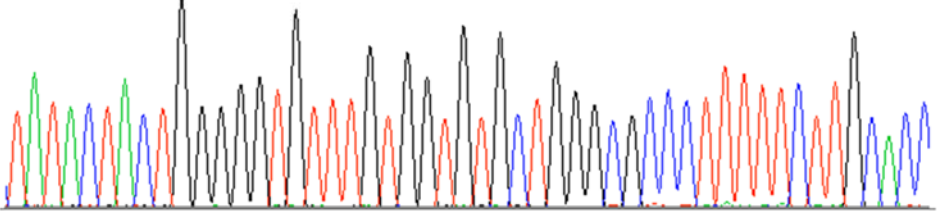

WT

320 330 340 350 360  
C T A T A C T A C T G G G C T G G G C G C C C T T T T T C T T G C A C C T C A T C C T C A T G A T C

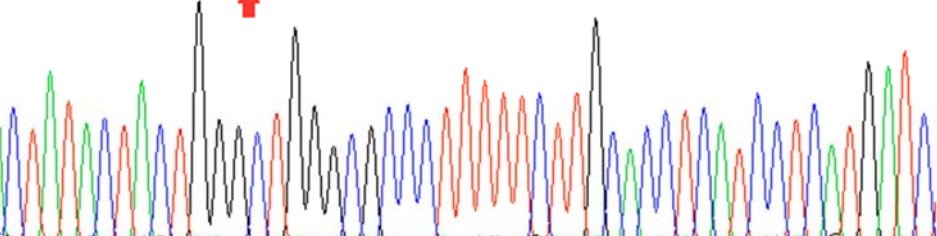

-15

320 330 340 350 360  
C T A T A C T A C T G G G G T G T T T G T G G G C G C C C T T T T T C T T G C A C C T C A T C C T

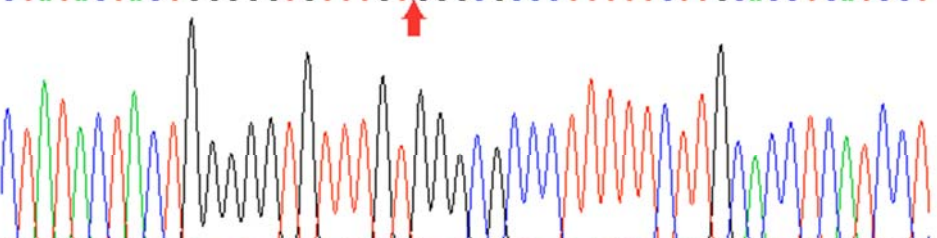

-8

340 350 360 370 380  
T A T A C T A C T G G G G T G T T T G T G G G C T G G G C G C C C T T T T T C T T G C A C C T C A

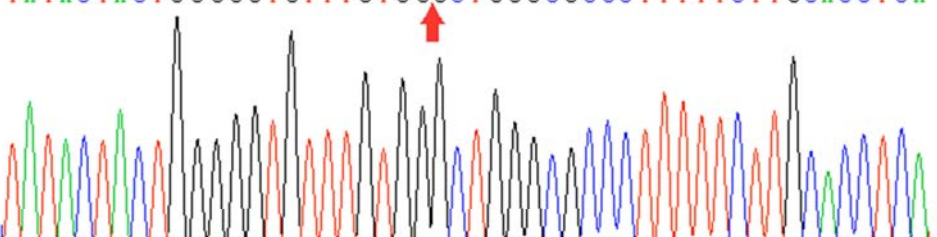

-3

340 350 360 370 380  
T A T A C T A C T G G G G T G T T T G T T G G G C G C C C T T T T T C T T G C A C C T C A T C C T

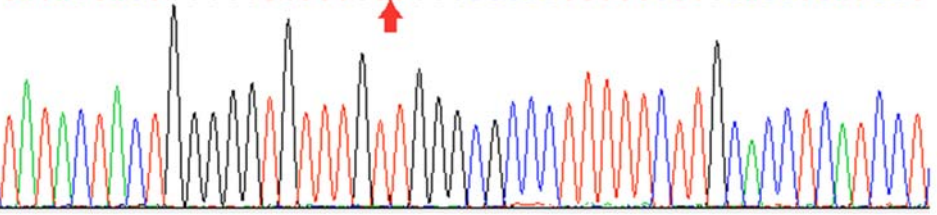

-7



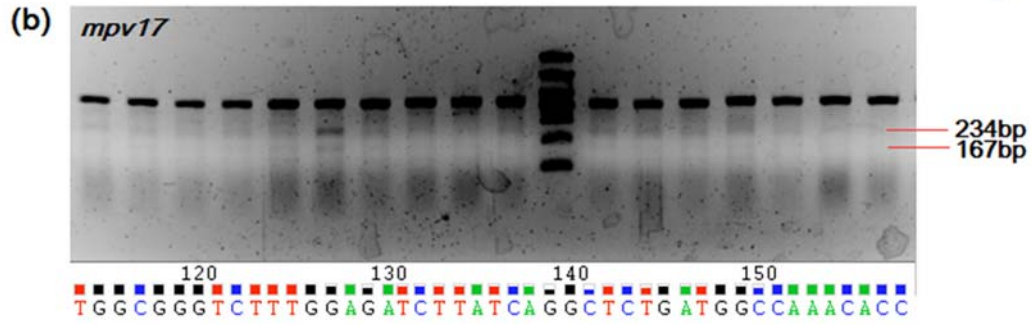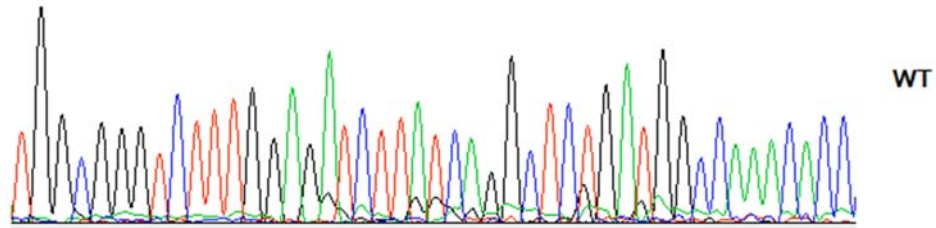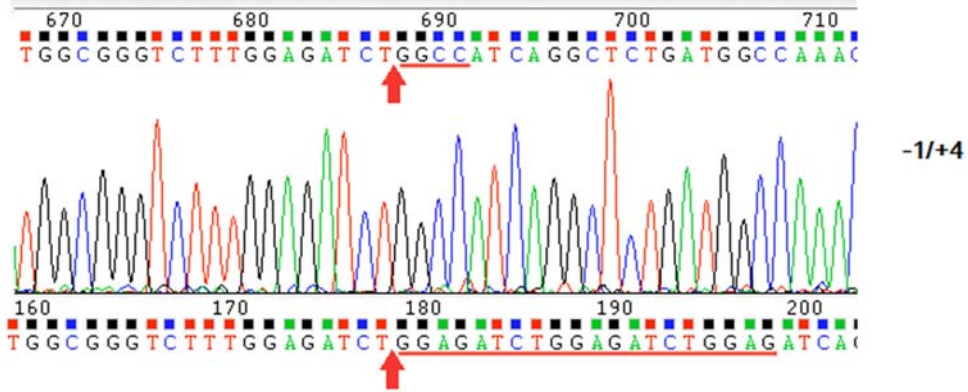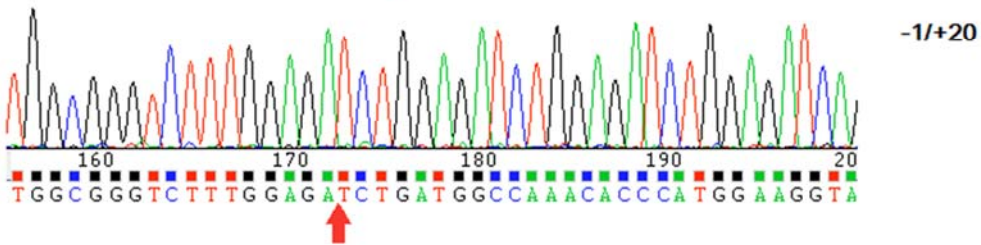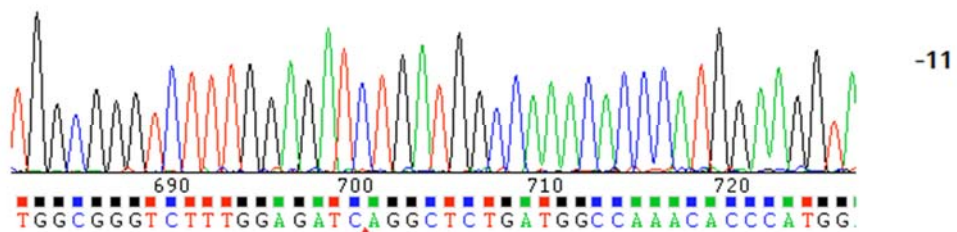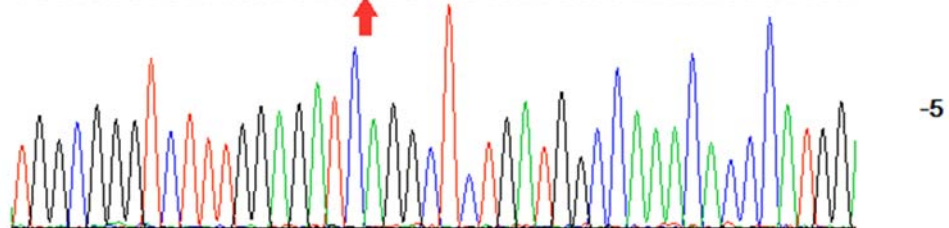

71

72

73

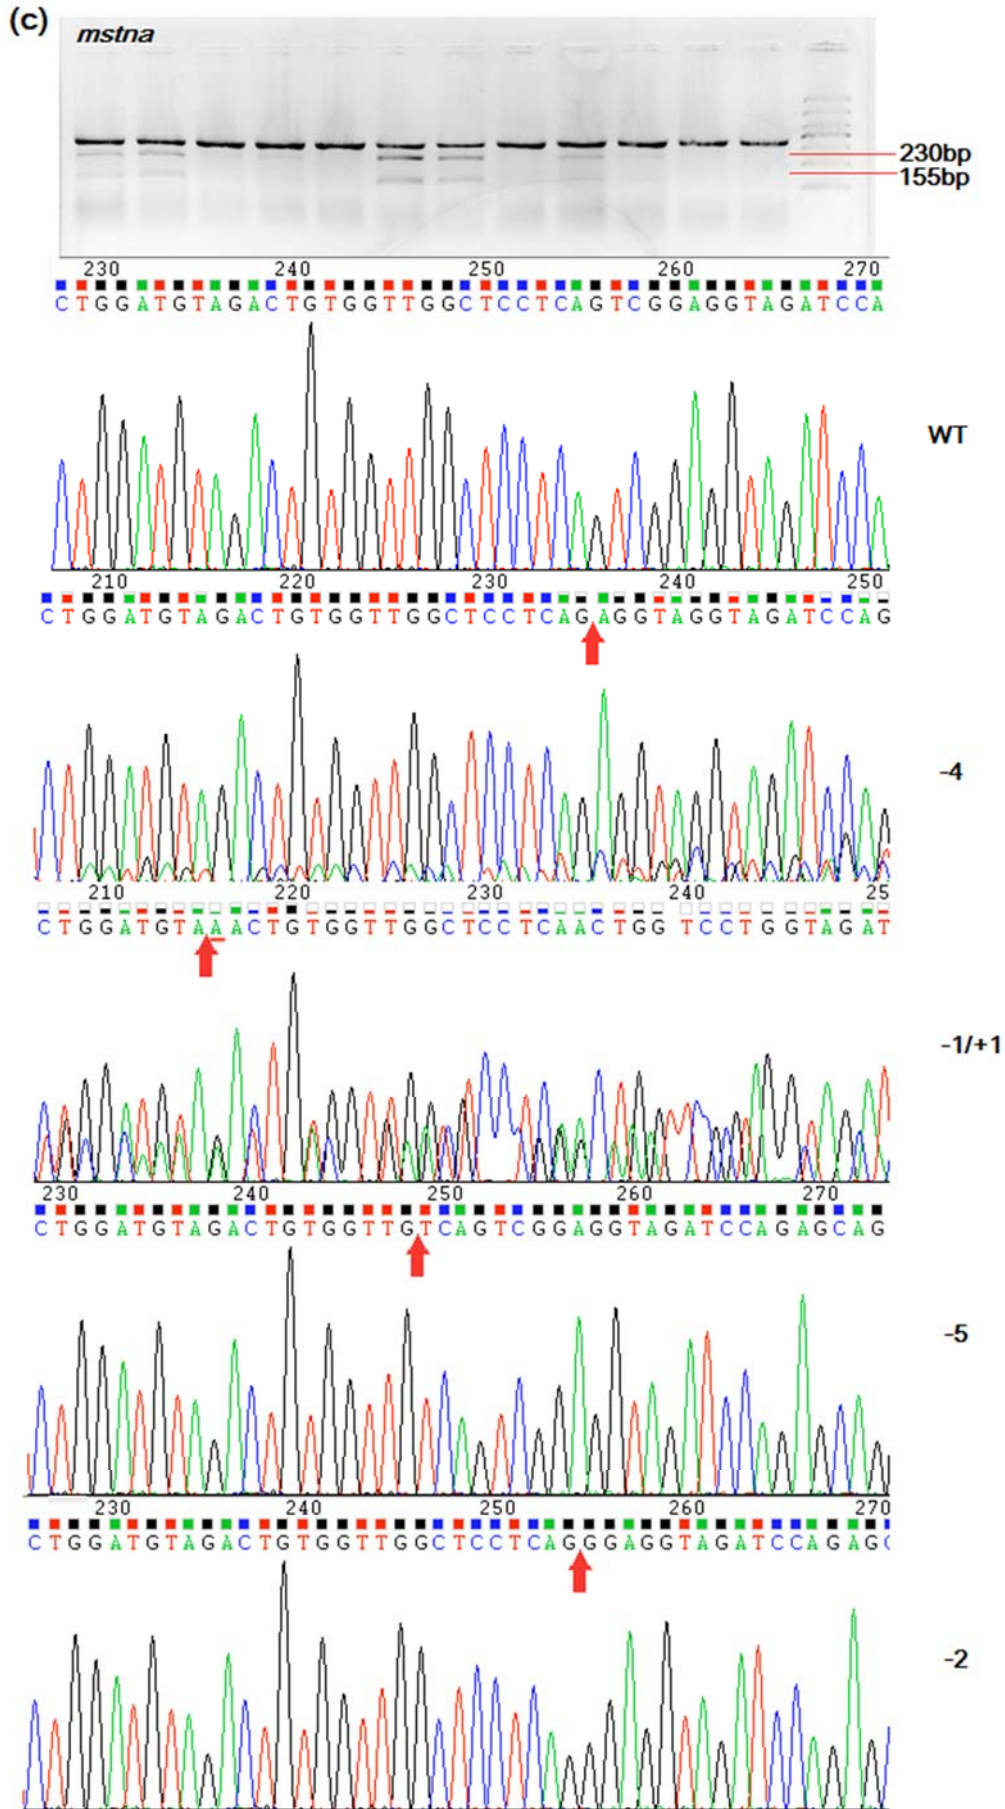

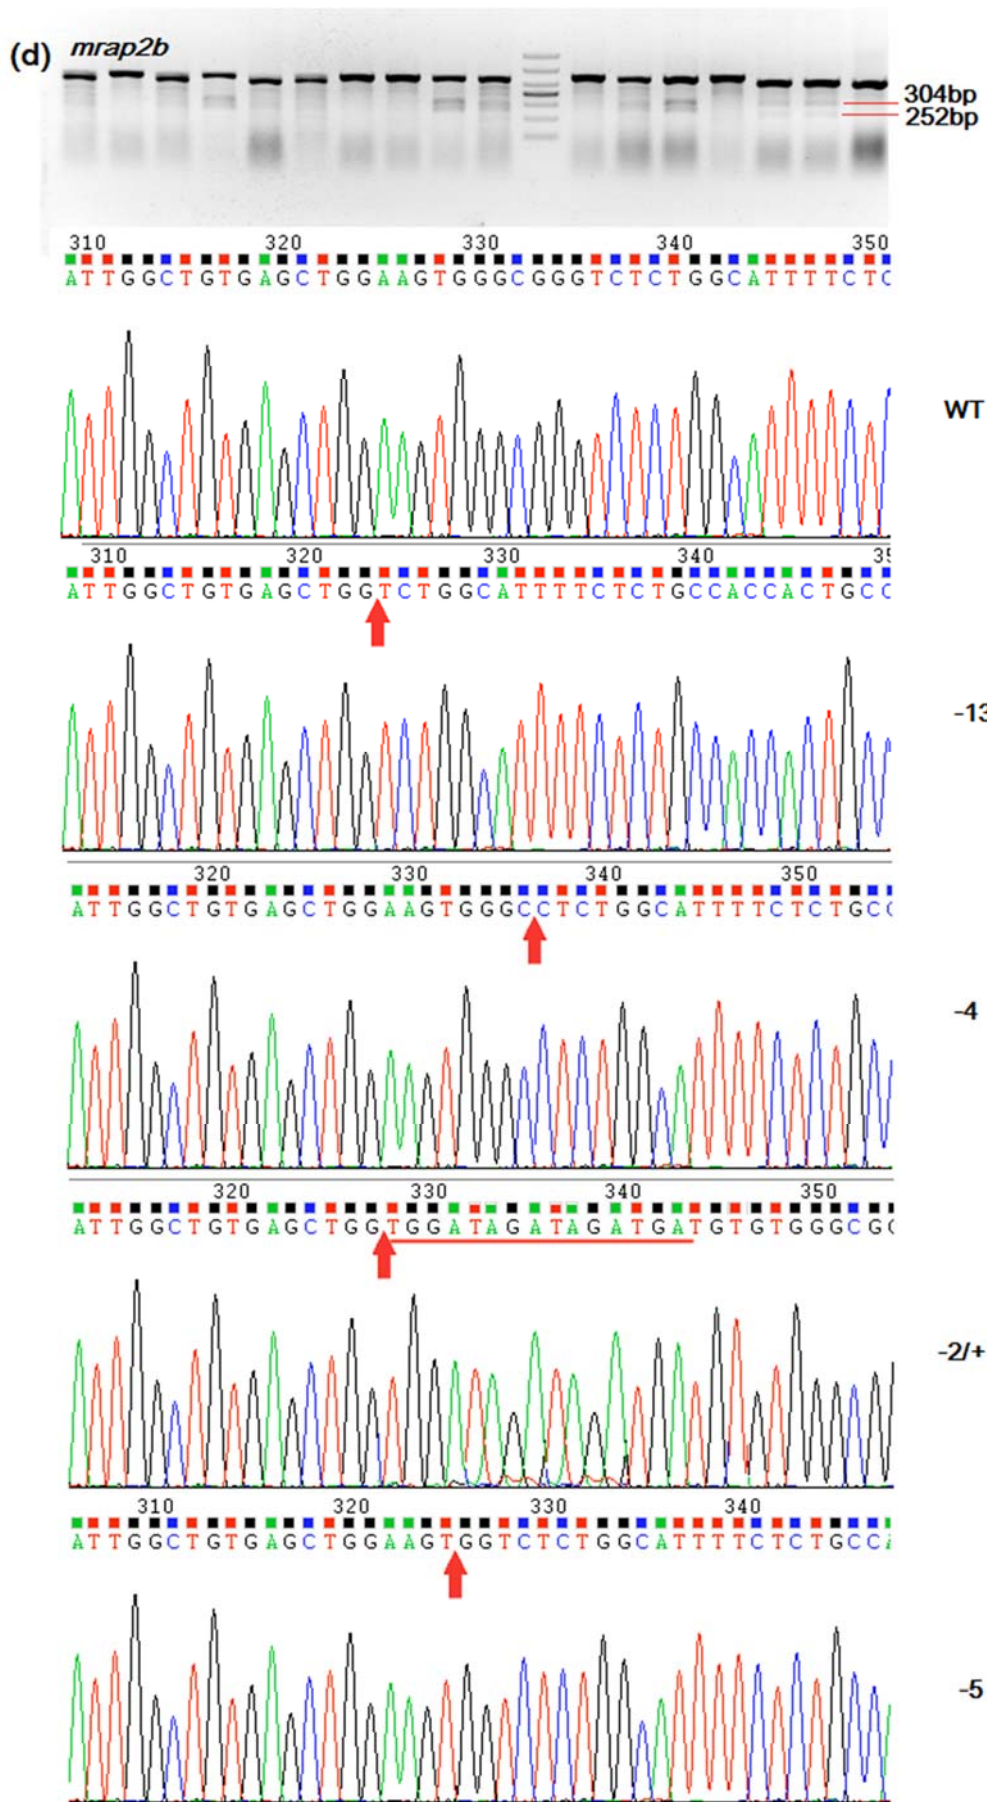

(e)

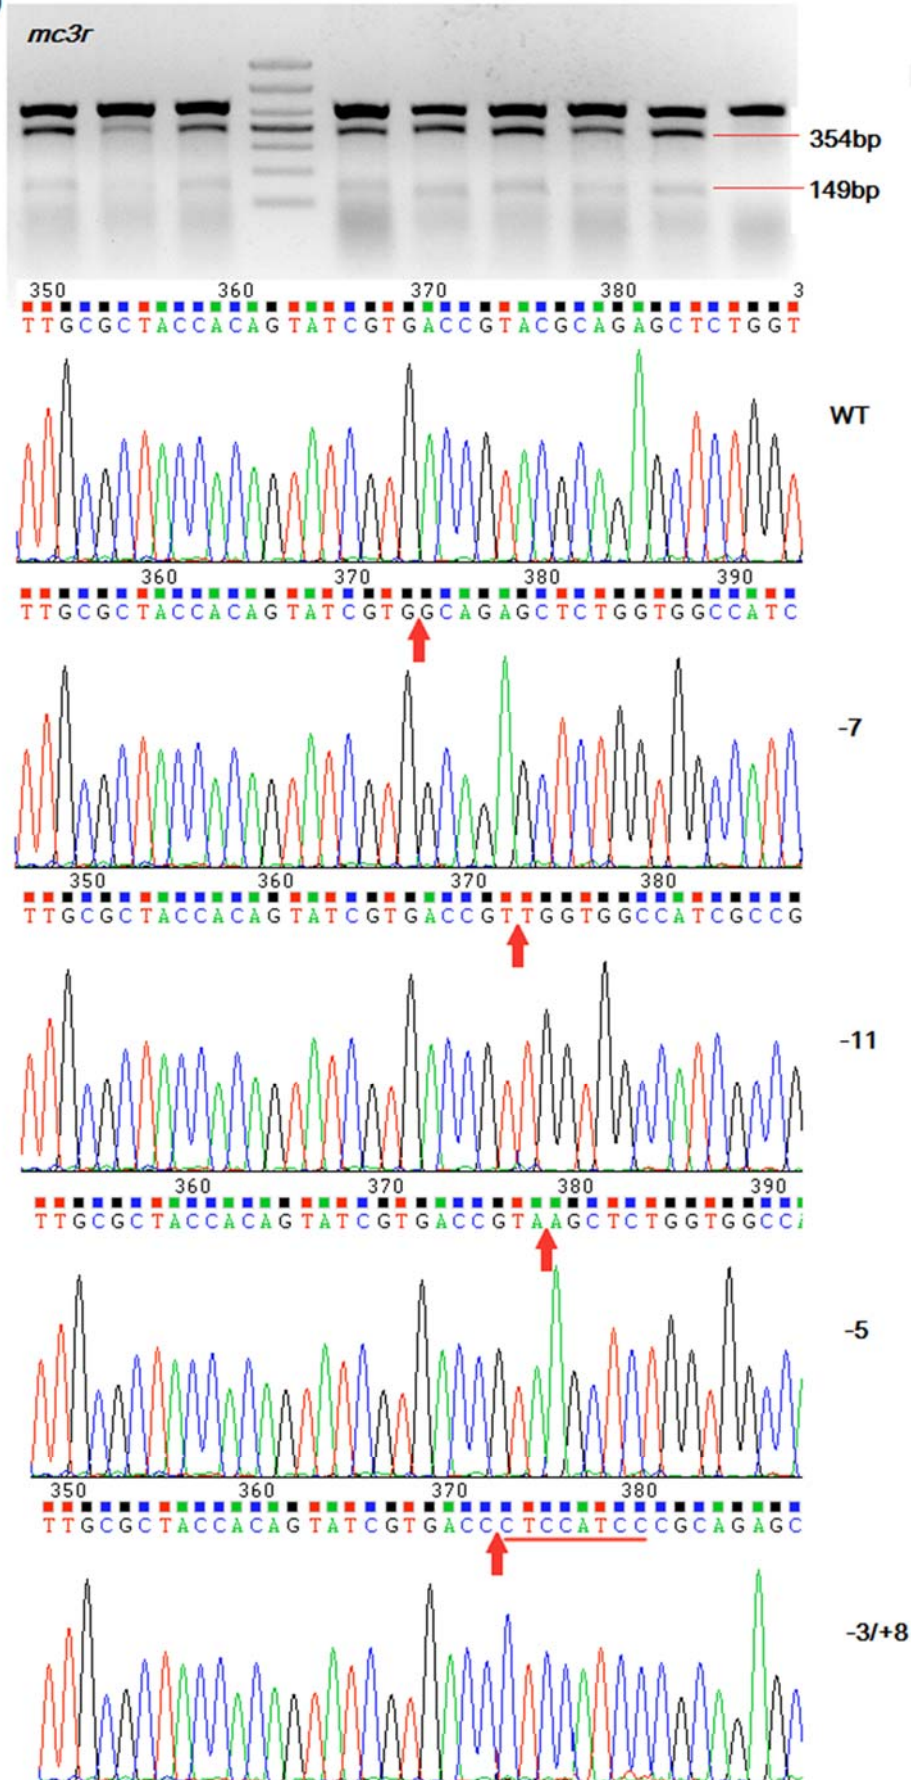

77 **Figure S3.** T7E1 assay and DNA sequencing of five genes disrupted by the novel  
78 CRISPR-Cas system based on *in vitro* oocyte injection and storage. (a), (b), (c), (d) and  
79 (e) were *mc4r*, *mpv17*, *mstna*, *mrp2b* and *mc3r*, respectively.  
80
